# Supplementary material
Source: ML conference proceedings conference paper supplement (https://openreview.net/forum?id=v6NNlubbSQ)

Raw data

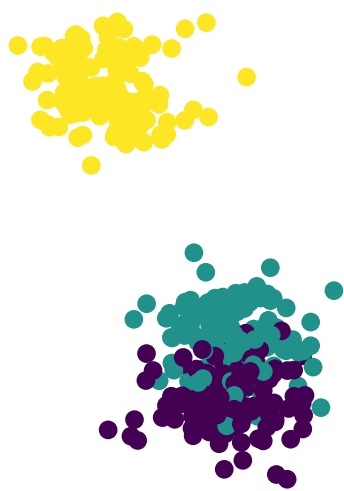

Predictions (ISJ)

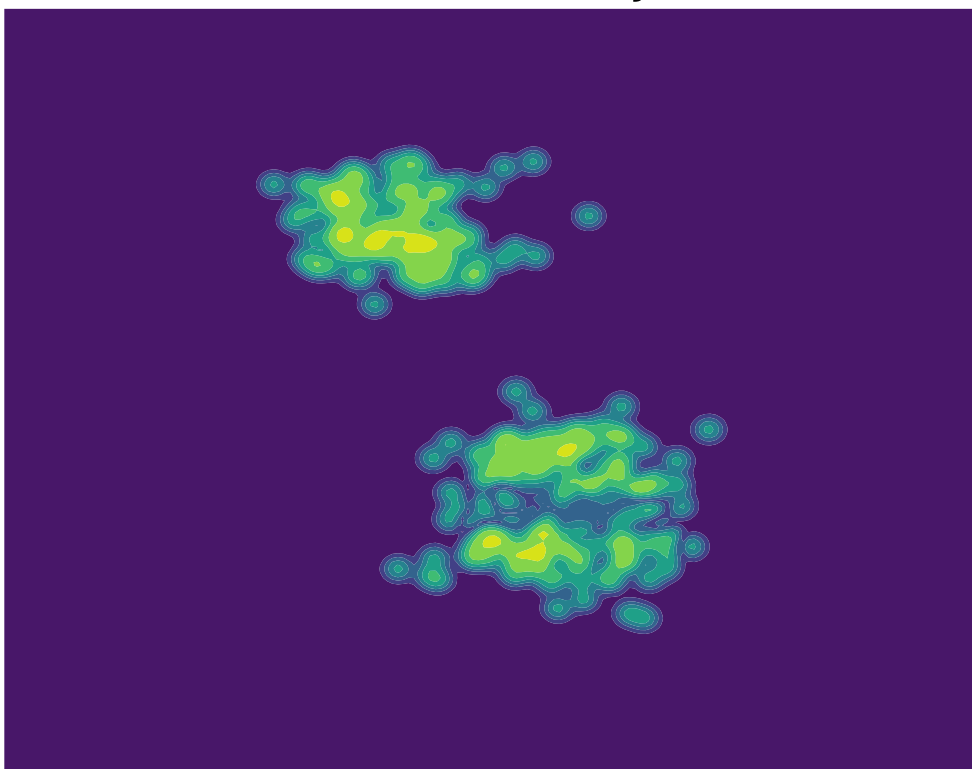

Uncertainty (epistemic)

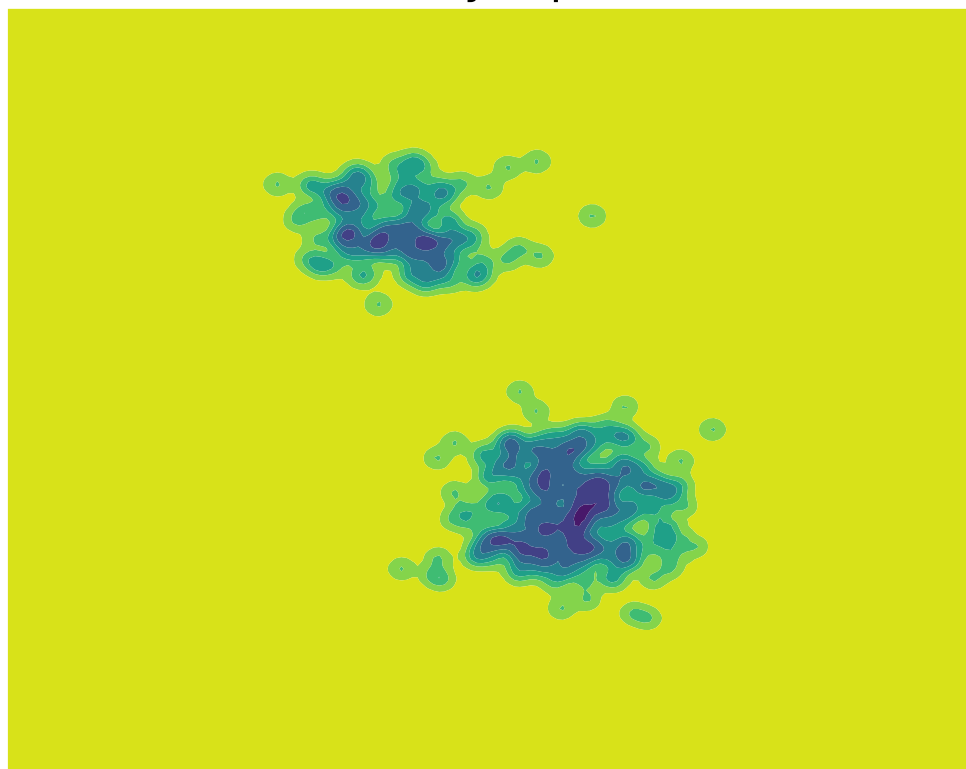

Uncertainty (aleatoric)

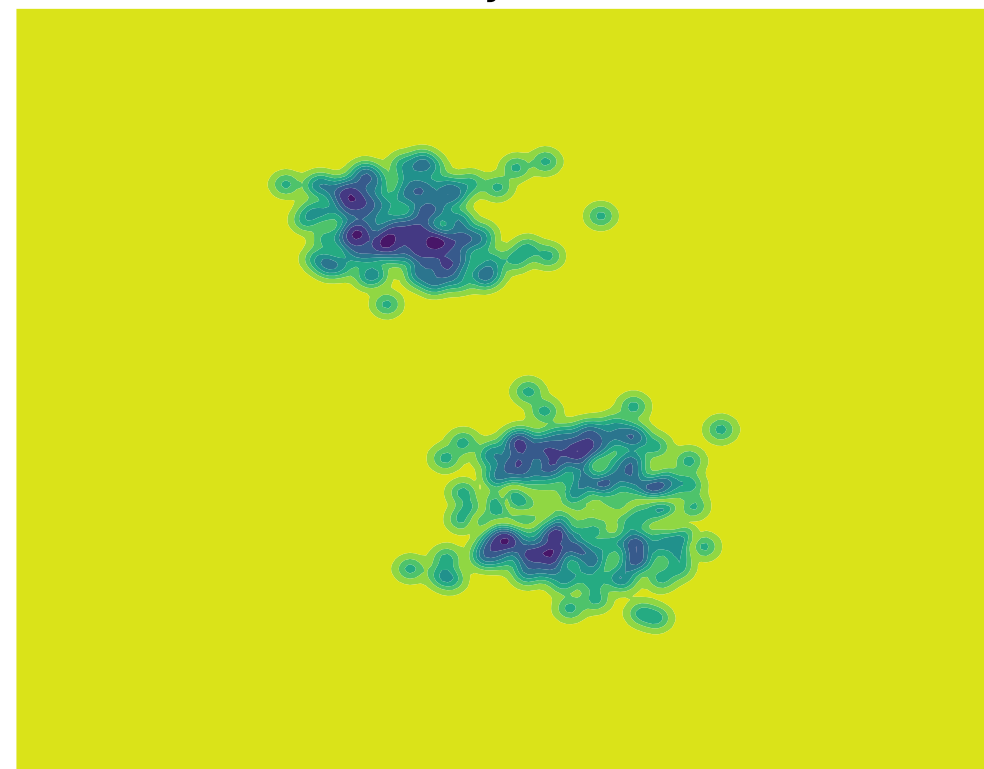

Predictions (classification)

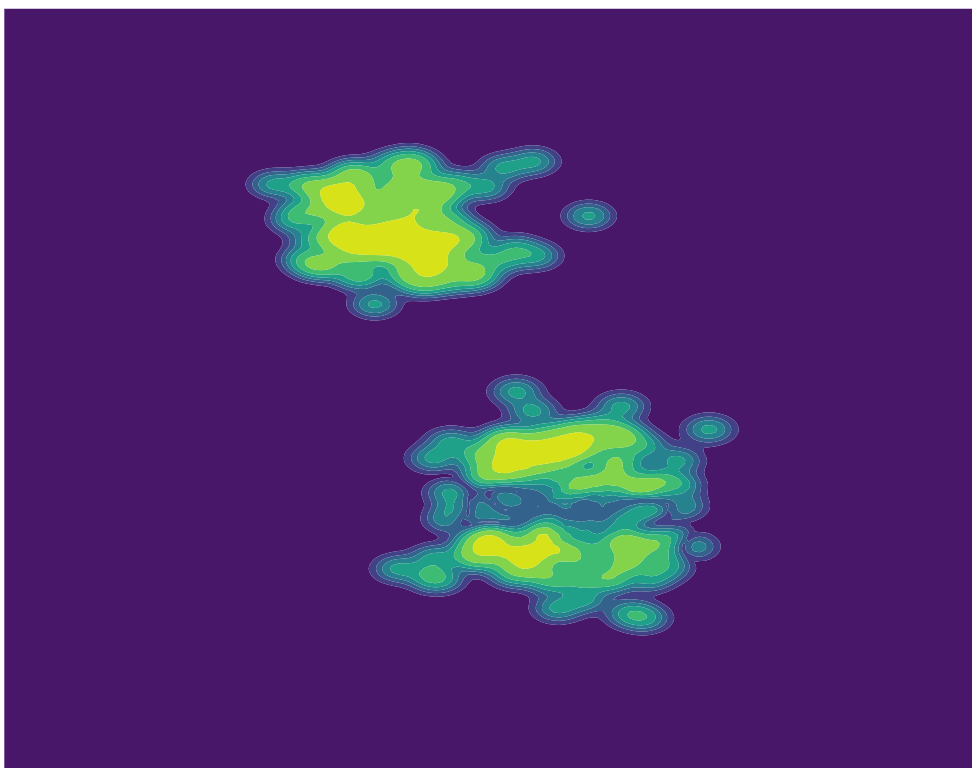

Uncertainty (epistemic)

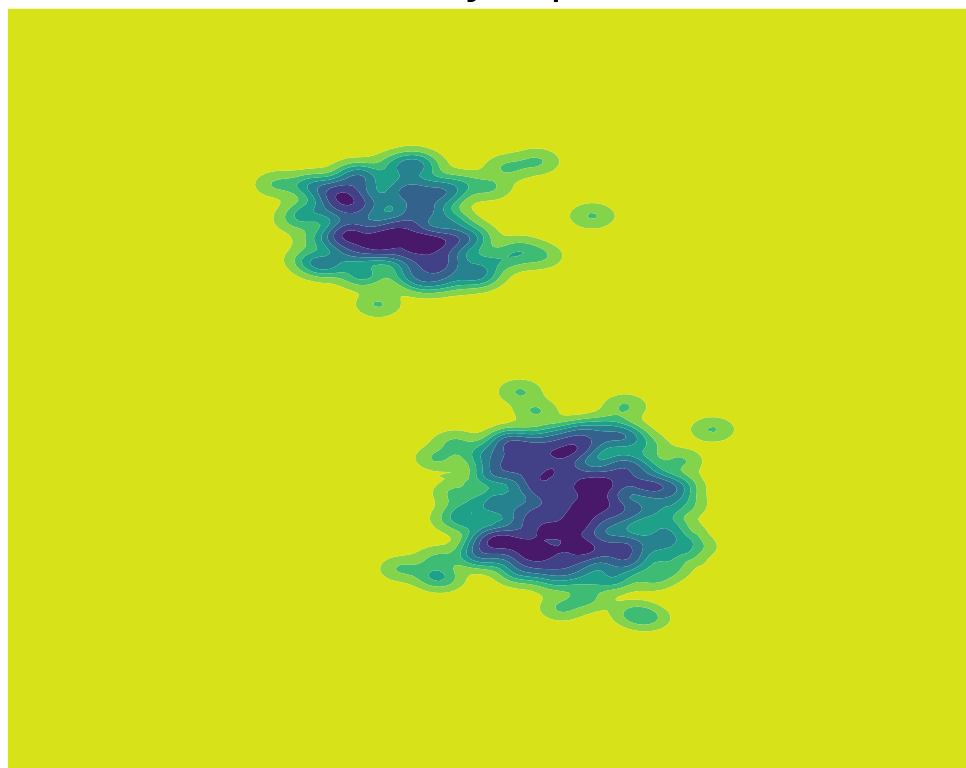

Uncertainty (aleatoric)

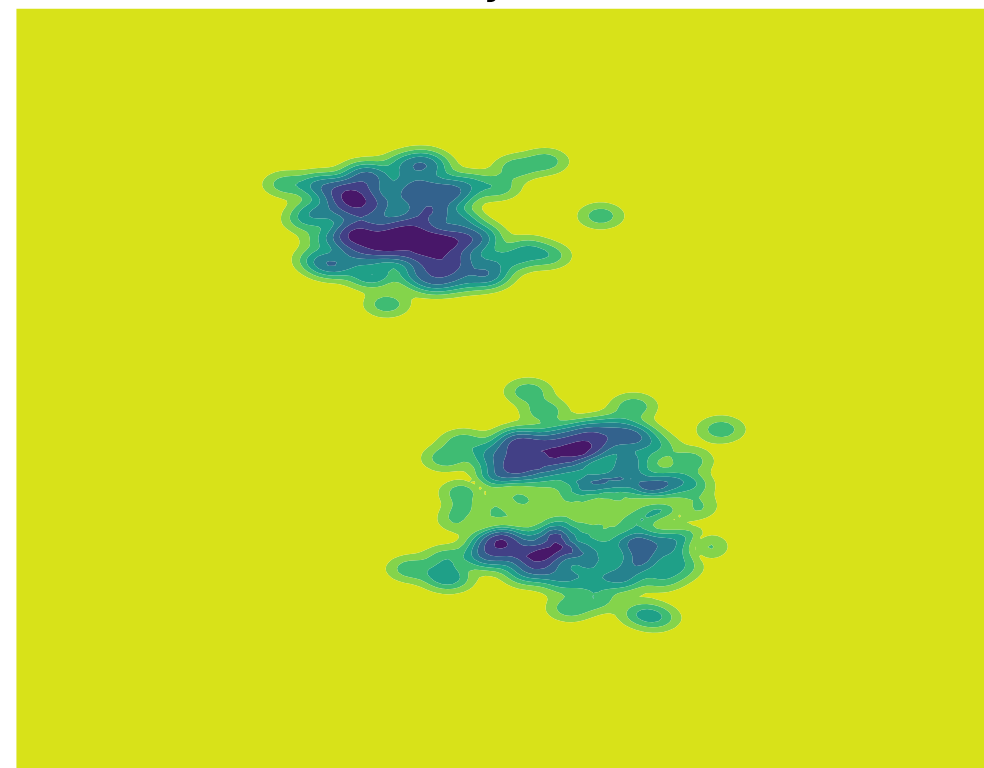

Predictions (random exponential)

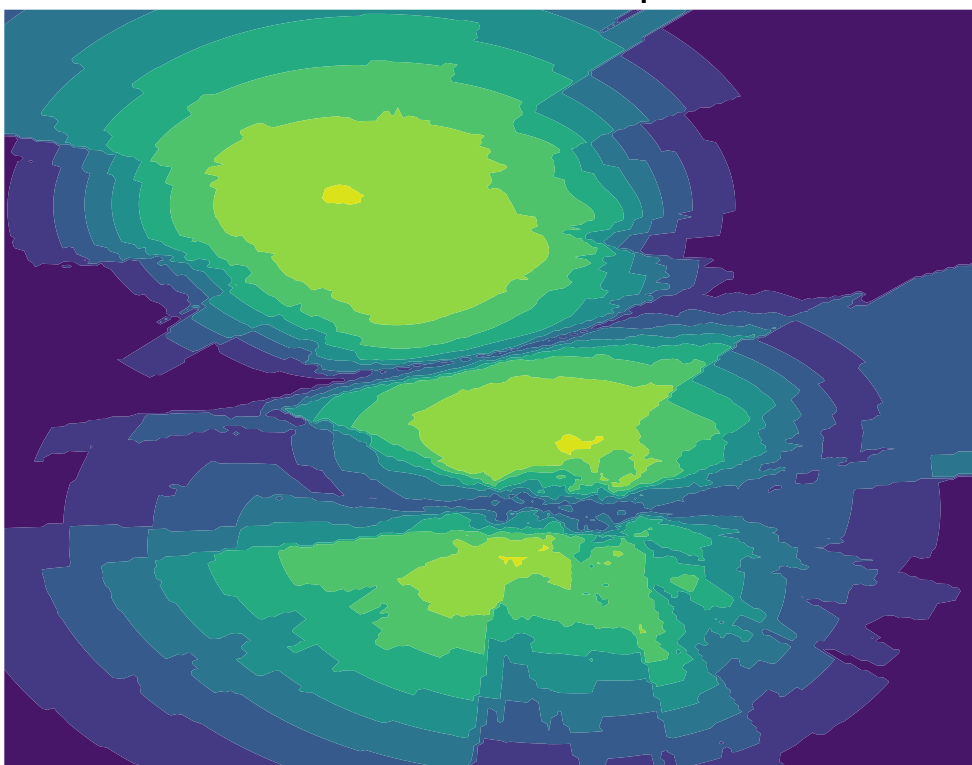

Uncertainty (epistemic)

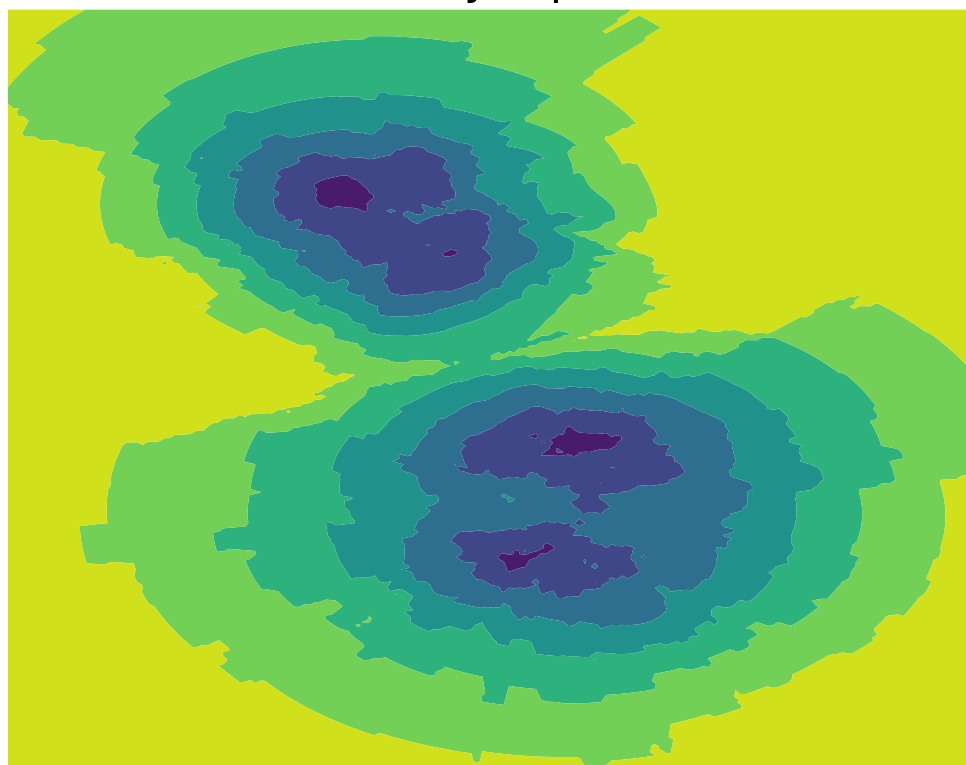

Uncertainty (aleatoric)

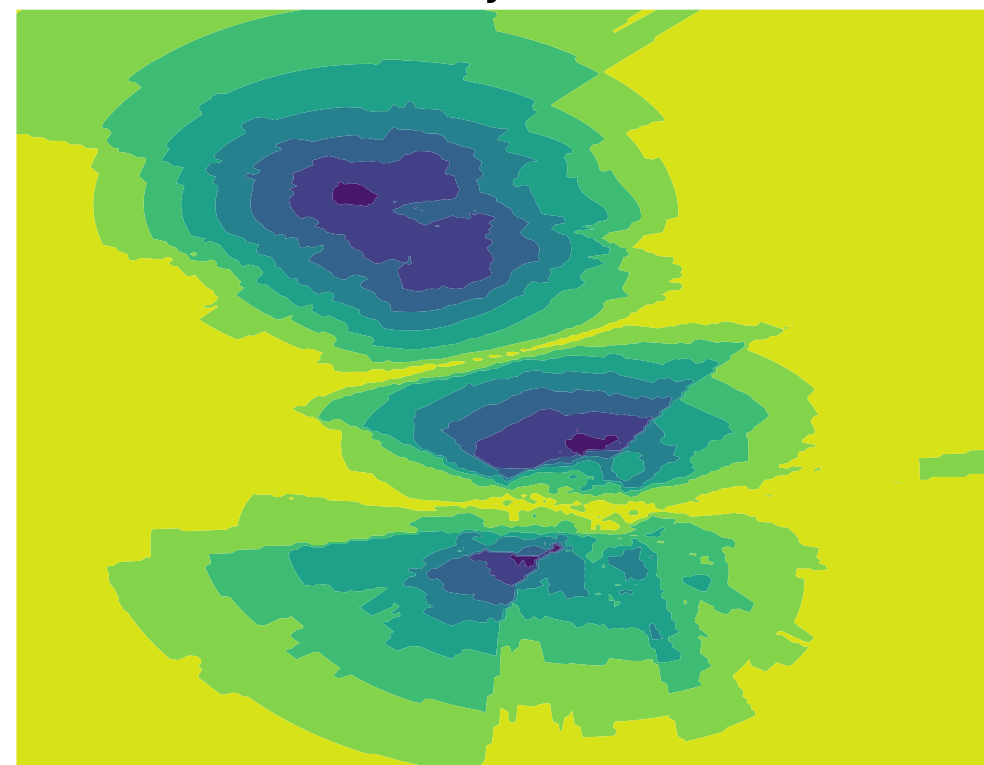

Supplement: supplementary_material [file attachment]
