# Supplementary material
Source: ML conference proceedings conference paper supplement (https://openreview.net/forum?id=v6NNlubbSQ)

Raw data

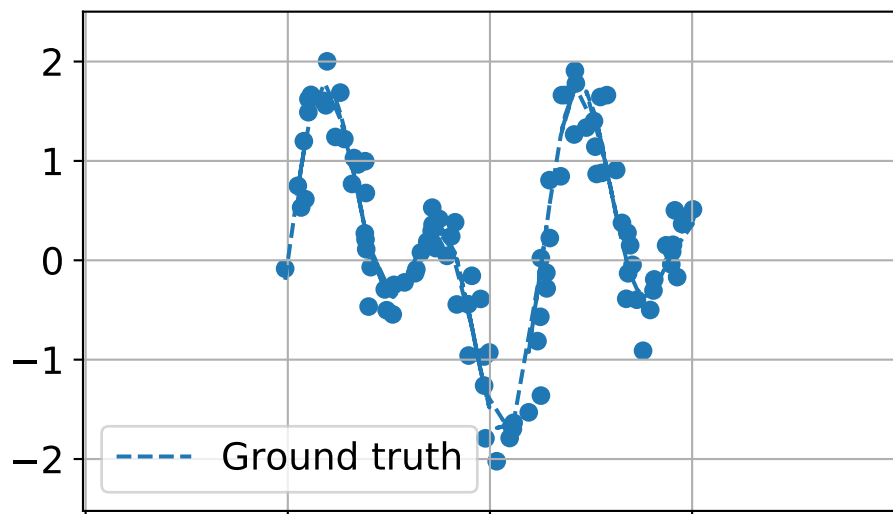

ISJ, epistemic

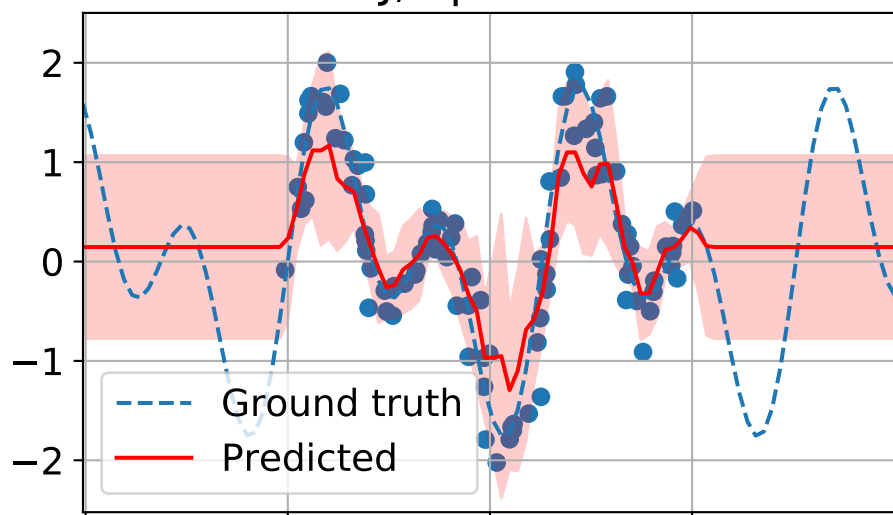

ISJ, aleatoric

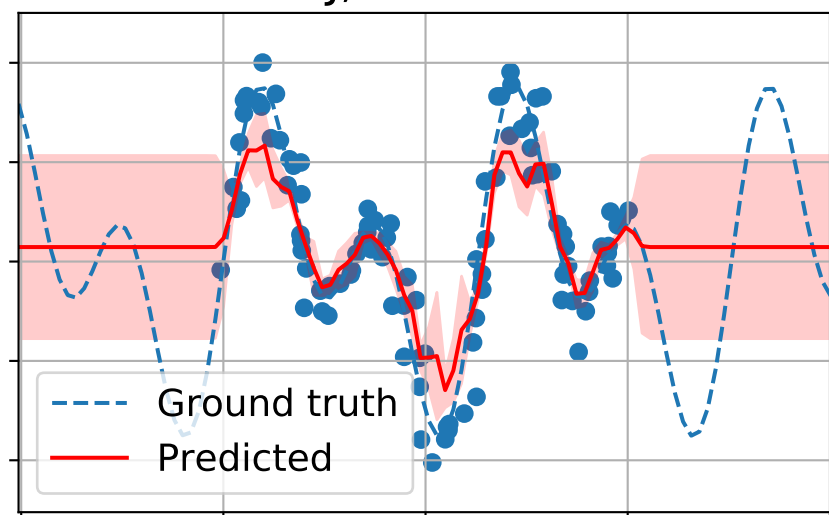

regression, epistemic

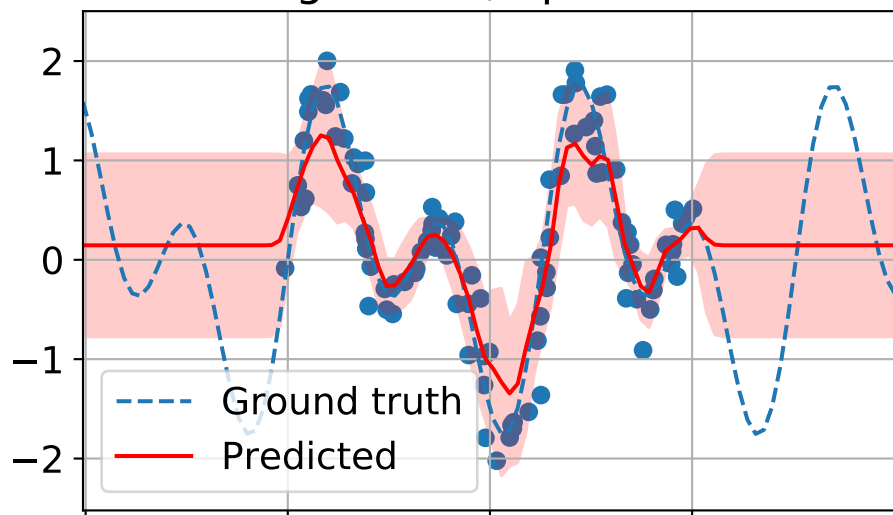

regression, aleatoric

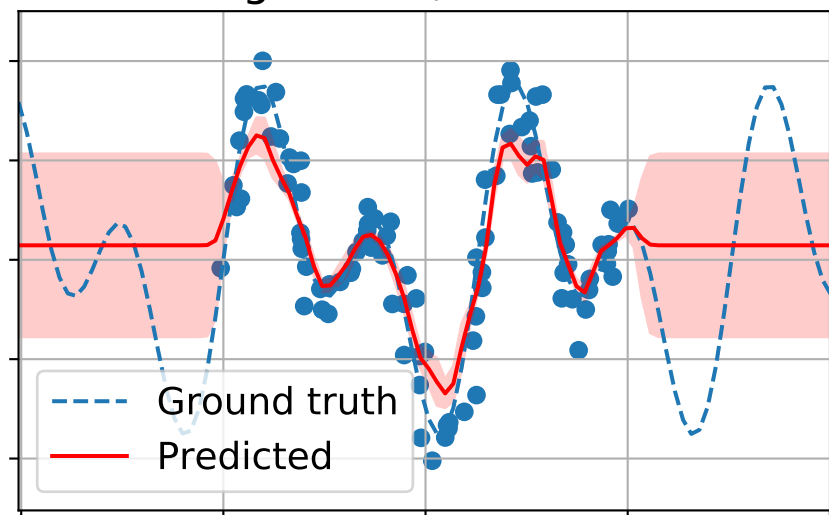

random exponential, epistemic

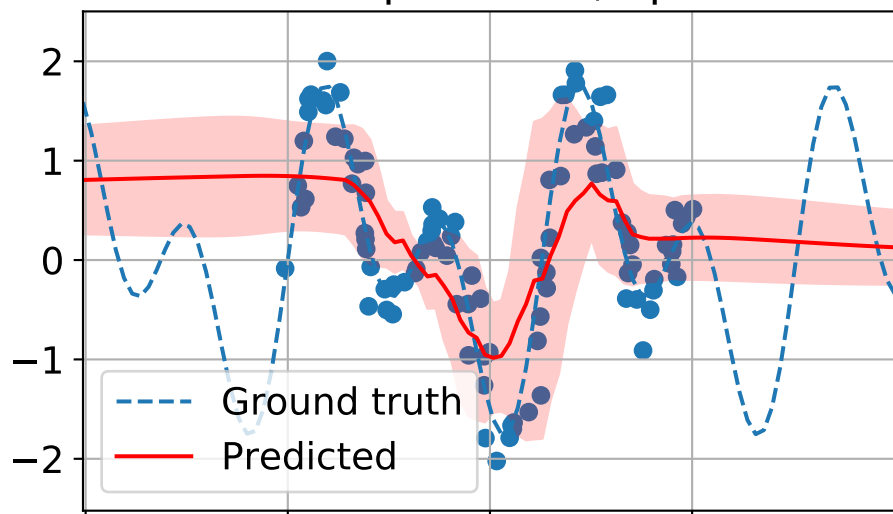

random exponential, aleatoric

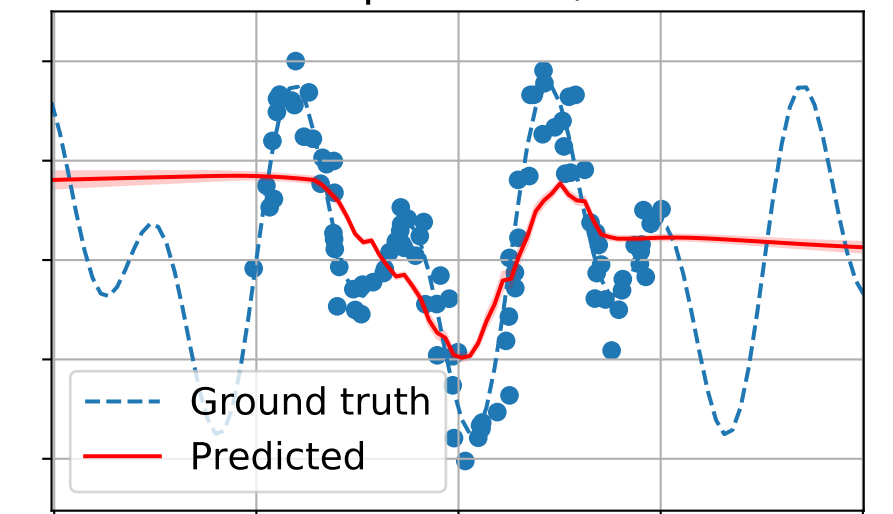

Supplement: supplementary_material [file attachment]
